# Supplementary material for: Aptamer–gold nanoparticle-signal probe bioconjugates amplify electrochemical signal for the detection of prostate specific antigen
Source: Royal Society of Chemistry journal article supplement (doi:10.1039/d1ay01175h), 2021-01-01
Supplement: d1ay01175h1.pdf [file d1ay01175h1.pdf]

**Aptamer-gold nanoparticles-signal probe bioconjugates amplify  
electrochemical signal for the detection of prostate specific antigen**

Mengyao Li, Wenjuan Zhang and Yuzhong Zhang\*

*School of Chemistry and Materials Science, Anhui Key Laboratory of Chem-Biosensing, Anhui*

*Normal University, Wuhu 241002, People's Republic of China*

---

\* Corresponding author. Tel: +86 553 3869303; Fax: +86 553 3869303

E-mail address: [zhyz65@mail.ahnu.edu.cn](mailto:zhyz65@mail.ahnu.edu.cn) (Y. Zhang)

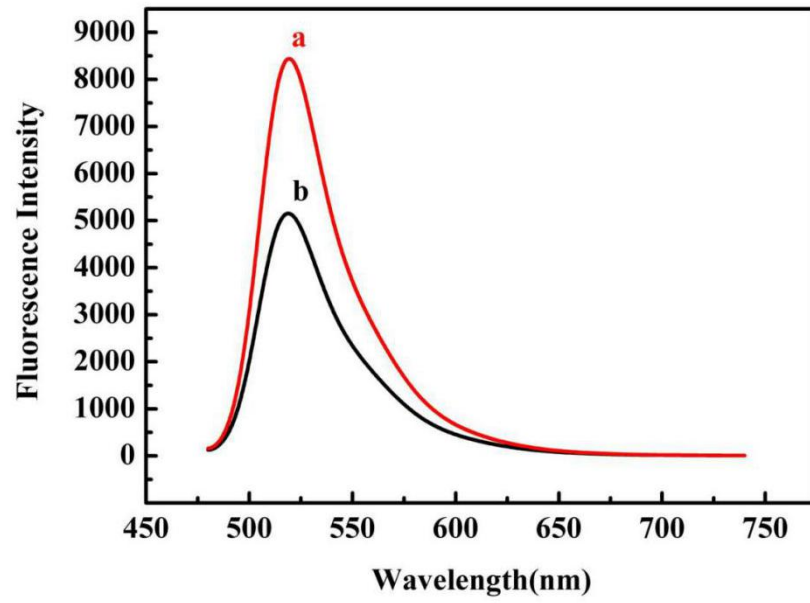

Fig.S1. Fluorescence curves of the unreacted signal sequence labeled with FAM in the supernate in absence

(a)and and presence of Au NPs(C).  $C_{Au\ NPs} = 0.1\ mg\ mL^{-1}$

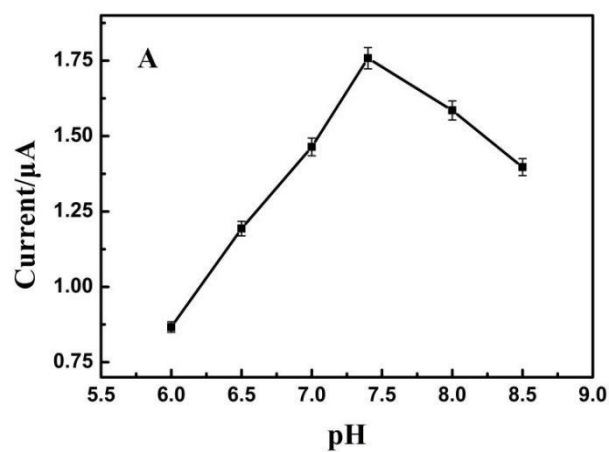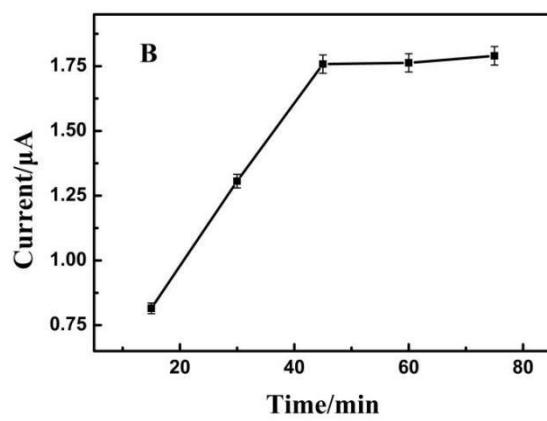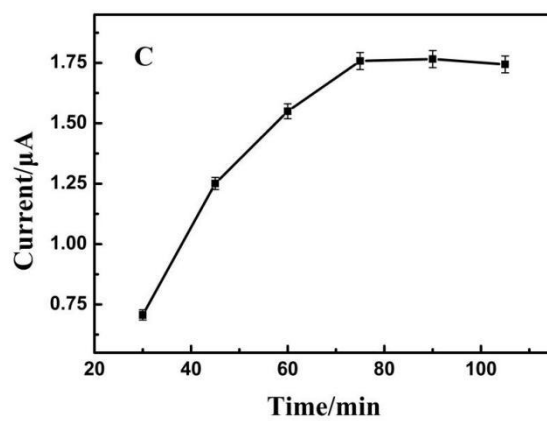

Fig S2 Optimization of experimental conditions (A) pH values; (B) The incubation time between Ab and PSA and (C) The incubation time between PSA and aptamer- Au NPs–signal probe. Conditions:  $C_{PSA}=1.0 \text{ ng mL}^{-1}$ ;  $C_{\text{aptamer}} = 1.0 \text{ } \mu\text{M}$

| Detection method               | Recognition element            | Linear range<br>(ng mL <sup>-1</sup> ) | Detection<br>limit (ng mL <sup>-1</sup> ) | Analysis time<br>(min) | References |
|--------------------------------|--------------------------------|----------------------------------------|-------------------------------------------|------------------------|------------|
| Electrochemical                | Aptamer                        | 0.125 ~ 200                            | 0.05                                      | 65                     | [8]        |
| Electrochemical                | Biotinated aptamer             | 0.25 ~ 200                             | 0.25                                      | 50                     | [19]       |
| Electrochemical                | Antibody-antigen               | 0.0001 ~75                             | 3.3×10 <sup>-5</sup>                      | 160                    | [23]       |
| Electrochemical                | Antibody- Aptamer              | 0.05 ~ 100                             | 0.017                                     | 110                    | [24]       |
| Fluorescence                   | Dye-labeled aptamer            | 0.50 ~ 300                             | 0.2                                       | 105                    | [29]       |
| Electrochemical                | Aminated aptamer               | 1 ~ 100                                | 1.0                                       | 160                    | [30]       |
| Electrochemical                | Aptamer-MIP hybrid<br>receptor | 0.10 ~ 100                             | 0.001                                     | 130                    | [31]       |
| Electrochemical                | Antibody                       | 0.05 ~50                               | 0.015                                     | 120                    | [32]       |
| Electrochemical<br>immunoassay | Antibody                       | 0.01 ~ 10                              | 0.002                                     | 120                    | [33]       |
| Chemiluminescence              | Dye-labeled aptamer            | 1.9 ~ 125                              | 1.0                                       | 30                     | [34]       |
| Colorimetric assay             | PSA peptide                    | 0.1 ~ 100                              | 0.1                                       | 5                      | [35]       |
| Surface plasmon<br>resonance   | Aptamer beacon                 | 0.1 ~ 50                               | 0.091                                     | 20                     | [36]       |
| Electrochemical                | Aptamer                        | 1 ~ 300                                | 0.28                                      | 50                     | [37]       |
| Electrochemical                | Antibody- Aptamer              | 0.001~75                               | 3.0×10 <sup>-3</sup>                      | 120                    | This work  |

**Table S.1** Analytical performance of various analytical method of PSA
